# Supplementary material for: Genomic Aromatic Compound Degradation Potential of Novel Paraburkholderia Species: Paraburkholderia domus sp. nov., Paraburkholderia haematera sp. nov. and Paraburkholderia nemoris sp. nov.
Source: MDPI journal article supplement (doi:10.3390/ijms22137003), 2021-06-29
Supplement: s1 [file s1]

Supplementary table S1. Pairwise dDDH values (formula  $d_4$ ) and their respective confidence intervals between the draft genomes of the 18 selected isolates and their closest neighbors.

| Strain 1 | Strain 2                                      | dDDH (%) | C.I. (%)      | Strain 1               | Strain 2                                      | dDDH (%) | C.I. (%)      |
|----------|-----------------------------------------------|----------|---------------|------------------------|-----------------------------------------------|----------|---------------|
| R-20943  | <i>P. aspalathi</i> LMG 27731 <sup>T</sup>    | 84.5     | [81.7 - 86.9] | R-69746                | R-75465                                       | 85.3     | [82.5 - 87.6] |
| R-20943  | <i>P. madseniana</i> RP11 <sup>T</sup>        | 57.4     | [54.6 - 60.1] | R-69746                | LMG 31836 <sup>T</sup>                        | 62.7     | [59.9 - 65.6] |
| R-20943  | <i>P. sediminicola</i> LMG 24238 <sup>T</sup> | 55.7     | [52.9 - 58.4] | R-69746                | R-69776                                       | 63       | [60.1 - 65.9] |
| R-20943  | <i>P. solitsugae</i> 1N <sup>T</sup>          | 41.4     | [38.9 - 44.0] | R-69746                | R-75777                                       | 63.1     | [60.2 - 65.9] |
| R-20943  | <i>P. elongata</i> 5N <sup>T</sup>            | 42.3     | [39.8 - 44.9] | R-69746                | LMG 31832 <sup>T</sup>                        | 40.8     | [38.3 - 43.4] |
| R-20943  | <i>P. caffeinilytica</i> CF1 <sup>T</sup>     | 43.2     | [40.7 - 45.8] | R-69746                | R-69749                                       | 41       | [38.5 - 43.5] |
| R-20943  | R-69658                                       | 83.4     | [80.6 - 85.9] | R-69746                | R-69927                                       | 40.9     | [38.4 - 43.4] |
| R-20943  | R-69746                                       | 84.9     | [82.2 - 87.3] | R-69746                | R-70006                                       | 40.8     | [38.3 - 43.4] |
| R-20943  | R-75465                                       | 83.9     | [81.1 - 86.4] | R-69746                | R-70199                                       | 40.8     | [38.3 - 43.3] |
| R-20943  | LMG 31836 <sup>T</sup>                        | 63.2     | [60.3 - 66.0] | R-69746                | R-70211                                       | 40.6     | [38.2 - 43.2] |
| R-20943  | LMG 31840                                     | 63.2     | [60.3 - 66.0] | R-69746                | R-75471                                       | 40.8     | [38.3 - 43.4] |
| R-20943  | R-69608                                       | 63.3     | [60.4 - 66.1] | R-69746                | LMG 31837 <sup>T</sup>                        | 39.6     | [37.1 - 42.1] |
| R-20943  | R-69776                                       | 63.3     | [60.4 - 66.1] | R-75465                | <i>P. aspalathi</i> LMG 27731 <sup>T</sup>    | 85.2     | [82.5 - 87.6] |
| R-20943  | R-75777                                       | 63.1     | [60.2 - 65.9] | R-75465                | <i>P. madseniana</i> RP11 <sup>T</sup>        | 56.7     | [53.9 - 59.4] |
| R-20943  | LMG 31832 <sup>T</sup>                        | 40.4     | [37.9 - 42.9] | R-75465                | <i>P. sediminicola</i> LMG 24238 <sup>T</sup> | 55.7     | [53.0 - 58.4] |
| R-20943  | R-69749                                       | 40.6     | [38.1 - 43.1] | R-75465                | <i>P. solitsugae</i> 1N <sup>T</sup>          | 41.3     | [38.8 - 43.9] |
| R-20943  | R-69927                                       | 40.4     | [37.9 - 43.0] | R-75465                | <i>P. elongata</i> 5N <sup>T</sup>            | 42.6     | [40.1 - 45.1] |
| R-20943  | R-70006                                       | 40.4     | [37.9 - 42.9] | R-75465                | <i>P. caffeinilytica</i> CF1 <sup>T</sup>     | 43.4     | [40.9 - 45.9] |
| R-20943  | R-70199                                       | 40.4     | [38.0 - 43.0] | R-75465                | R-75777                                       | 62.9     | [60.0 - 65.7] |
| R-20943  | R-70211                                       | 40.5     | [38.0 - 43.0] | R-75465                | LMG 31832 <sup>T</sup>                        | 40.6     | [38.1 - 43.2] |
| R-20943  | R-75471                                       | 40.4     | [37.9 - 43.0] | R-75465                | R-75471                                       | 40.6     | [38.1 - 43.2] |
| R-20943  | LMG 31837 <sup>T</sup>                        | 39.3     | [36.8 - 41.8] | LMG 31836 <sup>T</sup> | <i>P. aspalathi</i> LMG 27731 <sup>T</sup>    | 62.6     | [59.7 - 65.4] |
| R-69658  | <i>P. aspalathi</i> LMG 27731 <sup>T</sup>    | 82.9     | [80.1 - 85.4] | LMG 31836 <sup>T</sup> | <i>P. madseniana</i> RP11 <sup>T</sup>        | 57.3     | [54.6 - 60.1] |
| R-69658  | <i>P. madseniana</i> RP11 <sup>T</sup>        | 57.3     | [54.5 - 60.0] | LMG 31836 <sup>T</sup> | <i>P. sediminicola</i> LMG 24238 <sup>T</sup> | 55.5     | [52.7 - 58.2] |
| R-69658  | <i>P. sediminicola</i> LMG 24238 <sup>T</sup> | 55.8     | [53.0 - 58.5] | LMG 31836 <sup>T</sup> | <i>P. solitsugae</i> 1N <sup>T</sup>          | 41.2     | [38.7 - 43.8] |
| R-69658  | <i>P. solitsugae</i> 1N <sup>T</sup>          | 41.4     | [38.9 - 44.0] | LMG 31836 <sup>T</sup> | <i>P. elongata</i> 5N <sup>T</sup>            | 42.7     | [40.2 - 45.3] |
| R-69658  | <i>P. elongata</i> 5N <sup>T</sup>            | 42.6     | [40.1 - 45.1] | LMG 31836 <sup>T</sup> | <i>P. caffeinilytica</i> CF1 <sup>T</sup>     | 44       | [41.4 - 46.5] |
| R-69658  | <i>P. caffeinilytica</i> CF1 <sup>T</sup>     | 43.2     | [40.7 - 45.8] | LMG 31836 <sup>T</sup> | R-75465                                       | 62.9     | [60.0 - 65.7] |
| R-69658  | R-69746                                       | 83       | [80.1 - 85.5] | LMG 31836 <sup>T</sup> | R-75777                                       | 90.1     | [87.8 - 92.0] |
| R-69658  | R-75465                                       | 82.9     | [80.1 - 85.4] | LMG 31836 <sup>T</sup> | LMG 31832 <sup>T</sup>                        | 40.7     | [38.2 - 43.2] |
| R-69658  | LMG 31836 <sup>T</sup>                        | 63.9     | [60.9 - 66.7] | LMG 31836 <sup>T</sup> | R-75471                                       | 40.6     | [38.2 - 43.2] |
| R-69658  | R-69776                                       | 65.1     | [62.2 - 67.9] | LMG 22931              | <i>P. aspalathi</i> LMG 27731 <sup>T</sup>    | 63       | [60.1 - 65.9] |
| R-69658  | R-75777                                       | 65       | [62.1 - 67.8] | LMG 22931              | <i>P. madseniana</i> RP11 <sup>T</sup>        | 57.6     | [54.8 - 60.4] |
| R-69658  | LMG 31832 <sup>T</sup>                        | 40.7     | [38.2 - 43.2] | LMG 22931              | <i>P. sediminicola</i> LMG 24238 <sup>T</sup> | 55.6     | [52.9 - 58.3] |
| R-69658  | R-69749                                       | 40.8     | [38.3 - 43.3] | LMG 22931              | <i>P. solitsugae</i> 1N <sup>T</sup>          | 41.4     | [38.9 - 43.9] |
| R-69658  | R-69927                                       | 40.7     | [38.2 - 43.2] | LMG 22931              | <i>P. elongata</i> 5N <sup>T</sup>            | 43       | [40.5 - 45.6] |
| R-69658  | R-70006                                       | 40.7     | [38.2 - 43.2] | LMG 22931              | <i>P. caffeinilytica</i> CF1 <sup>T</sup>     | 44       | [41.5 - 46.6] |
| R-69658  | R-70199                                       | 40.9     | [38.4 - 43.4] | LMG 22931              | R-20943                                       | 63.4     | [60.5 - 66.2] |
| R-69658  | R-70211                                       | 40.7     | [38.2 - 43.3] | LMG 22931              | R-69658                                       | 64.9     | [62.0 - 67.8] |
| R-69658  | R-75471                                       | 40.8     | [38.3 - 43.3] | LMG 22931              | R-69746                                       | 63       | [60.1 - 65.8] |
| R-69658  | LMG 31837 <sup>T</sup>                        | 39.4     | [37.0 - 42.0] | LMG 22931              | R-75465                                       | 63       | [60.1 - 65.8] |
| R-69746  | <i>P. aspalathi</i> LMG 27731 <sup>T</sup>    | 85       | [82.3 - 87.4] | LMG 22931              | LMG 31836 <sup>T</sup>                        | 90.4     | [88.1 - 92.3] |
| R-69746  | <i>P. madseniana</i> RP11 <sup>T</sup>        | 57.1     | [54.3 - 59.8] | LMG 22931              | LMG 31840                                     | 89.4     | [87.1 - 91.4] |
| R-69746  | <i>P. sediminicola</i> LMG 24238 <sup>T</sup> | 55.7     | [53.0 - 58.4] | LMG 22931              | R-69608                                       | 89.6     | [87.2 - 91.6] |
| R-69746  | <i>P. solitsugae</i> 1N <sup>T</sup>          | 41.3     | [38.8 - 43.8] | LMG 22931              | R-69776                                       | 89.7     | [87.3 - 91.7] |
| R-69746  | <i>P. elongata</i> 5N <sup>T</sup>            | 42.6     | [40.1 - 45.1] | LMG 22931              | R-75777                                       | 90.1     | [87.8 - 92.0] |
| R-69746  | <i>P. caffeinilytica</i> CF1 <sup>T</sup>     | 43.3     | [40.8 - 45.8] | LMG 22931              | LMG 31832 <sup>T</sup>                        | 40.9     | [38.4 - 43.5] |

| Strain 1  | Strain 2                                      | dDDH (%) | C.I. (%)      | Strain 1               | Strain 2                                      | dDDH (%) | C.I. (%)      |
|-----------|-----------------------------------------------|----------|---------------|------------------------|-----------------------------------------------|----------|---------------|
| LMG 22931 | R-69749                                       | 41.3     | [38.8 - 43.8] | R-69608                | LMG 31837 <sup>T</sup>                        | 39.8     | [37.3 - 42.3] |
| LMG 22931 | R-69927                                       | 40.8     | [38.3 - 43.4] | R-69776                | <i>P. aspalathi</i> LMG 27731 <sup>T</sup>    | 62.8     | [59.9 - 65.6] |
| LMG 22931 | R-70006                                       | 40.9     | [38.4 - 43.4] | R-69776                | <i>P. madseniana</i> RP11 <sup>T</sup>        | 57       | [54.2 - 59.7] |
| LMG 22931 | R-70199                                       | 40.9     | [38.4 - 43.5] | R-69776                | <i>P. sediminicola</i> LMG 24238 <sup>T</sup> | 55.4     | [52.6 - 58.1] |
| LMG 22931 | R-70211                                       | 40.8     | [38.4 - 43.4] | R-69776                | <i>P. solitsugae</i> 1N <sup>T</sup>          | 41.2     | [38.7 - 43.8] |
| LMG 22931 | R-75471                                       | 40.9     | [38.4 - 43.4] | R-69776                | <i>P. elongata</i> 5N <sup>T</sup>            | 42.6     | [40.1 - 45.2] |
| LMG 22931 | LMG 31837 <sup>T</sup>                        | 39.7     | [37.2 - 42.2] | R-69776                | <i>P. caffeinilytica</i> CF1 <sup>T</sup>     | 43.7     | [41.2 - 46.3] |
| LMG 31840 | <i>P. aspalathi</i> LMG 27731 <sup>T</sup>    | 63       | [60.1 - 65.8] | R-69776                | R-75465                                       | 62.8     | [59.9 - 65.6] |
| LMG 31840 | <i>P. madseniana</i> RP11 <sup>T</sup>        | 57.5     | [54.7 - 60.2] | R-69776                | LMG 31836 <sup>T</sup>                        | 89.5     | [87.1 - 91.5] |
| LMG 31840 | <i>P. sediminicola</i> LMG 24238 <sup>T</sup> | 55.5     | [52.8 - 58.3] | R-69776                | R-75777                                       | 98       | [97.1 - 98.6] |
| LMG 31840 | <i>P. solitsugae</i> 1N <sup>T</sup>          | 41.4     | [38.9 - 43.9] | R-69776                | LMG 31832 <sup>T</sup>                        | 41.1     | [38.6 - 43.7] |
| LMG 31840 | <i>P. elongata</i> 5N <sup>T</sup>            | 42.9     | [40.4 - 45.5] | R-69776                | R-69927                                       | 41.1     | [38.6 - 43.7] |
| LMG 31840 | <i>P. caffeinilytica</i> CF1 <sup>T</sup>     | 43.8     | [41.2 - 46.3] | R-69776                | R-70006                                       | 41.1     | [38.6 - 43.7] |
| LMG 31840 | R-69658                                       | 65.3     | [62.4 - 68.1] | R-69776                | R-70199                                       | 41.1     | [38.6 - 43.7] |
| LMG 31840 | R-69746                                       | 63.2     | [60.3 - 66.0] | R-69776                | R-70211                                       | 40.7     | [38.3 - 43.3] |
| LMG 31840 | R-75465                                       | 63.2     | [60.3 - 66.0] | R-69776                | R-75471                                       | 41.1     | [38.6 - 43.6] |
| LMG 31840 | LMG 31836 <sup>T</sup>                        | 89.2     | [86.8 - 91.2] | R-69776                | LMG 31837 <sup>T</sup>                        | 39.7     | [37.2 - 42.2] |
| LMG 31840 | R-69776                                       | 91.2     | [89.1 - 93.0] | R-75777                | <i>P. aspalathi</i> LMG 27731 <sup>T</sup>    | 62.8     | [59.9 - 65.6] |
| LMG 31840 | R-75777                                       | 91.6     | [89.5 - 93.3] | R-75777                | <i>P. madseniana</i> RP11 <sup>T</sup>        | 57.4     | [54.6 - 60.2] |
| LMG 31840 | LMG 31832 <sup>T</sup>                        | 41.2     | [38.7 - 43.7] | R-75777                | <i>P. sediminicola</i> LMG 24238 <sup>T</sup> | 55.5     | [52.8 - 58.2] |
| LMG 31840 | R-69749                                       | 43.7     | [41.1 - 46.2] | R-75777                | <i>P. solitsugae</i> 1N <sup>T</sup>          | 41.4     | [38.9 - 43.9] |
| LMG 31840 | R-69927                                       | 41.1     | [38.6 - 43.7] | R-75777                | <i>P. elongata</i> 5N <sup>T</sup>            | 42.8     | [40.3 - 45.4] |
| LMG 31840 | R-70006                                       | 41.1     | [38.6 - 43.7] | R-75777                | <i>P. caffeinilytica</i> CF1 <sup>T</sup>     | 43.9     | [41.3 - 46.4] |
| LMG 31840 | R-70199                                       | 41.2     | [38.7 - 43.7] | LMG 31832 <sup>T</sup> | <i>P. aspalathi</i> LMG 27731 <sup>T</sup>    | 40.6     | [38.1 - 43.1] |
| LMG 31840 | R-70211                                       | 40.8     | [38.3 - 43.3] | LMG 31832 <sup>T</sup> | <i>P. madseniana</i> RP11 <sup>T</sup>        | 41.9     | [39.4 - 44.4] |
| LMG 31840 | R-75471                                       | 41.1     | [38.7 - 43.7] | LMG 31832 <sup>T</sup> | <i>P. sediminicola</i> LMG 24238 <sup>T</sup> | 39.9     | [37.5 - 42.5] |
| LMG 31840 | LMG 31837 <sup>T</sup>                        | 39.7     | [37.2 - 42.2] | LMG 31832 <sup>T</sup> | <i>P. solitsugae</i> 1N <sup>T</sup>          | 46.3     | [43.7 - 48.9] |
| R-69608   | <i>P. aspalathi</i> LMG 27731 <sup>T</sup>    | 63       | [60.1 - 65.9] | LMG 31832 <sup>T</sup> | <i>P. elongata</i> 5N <sup>T</sup>            | 43.8     | [41.3 - 46.4] |
| R-69608   | <i>P. madseniana</i> RP11 <sup>T</sup>        | 57.5     | [54.7 - 60.2] | LMG 31832 <sup>T</sup> | <i>P. caffeinilytica</i> CF1 <sup>T</sup>     | 39.8     | [37.3 - 42.3] |
| R-69608   | <i>P. sediminicola</i> LMG 24238 <sup>T</sup> | 55.4     | [52.7 - 58.2] | LMG 31832 <sup>T</sup> | R-75777                                       | 40.9     | [38.4 - 43.4] |
| R-69608   | <i>P. solitsugae</i> 1N <sup>T</sup>          | 41.4     | [38.9 - 43.9] | R-69749                | <i>P. aspalathi</i> LMG 27731 <sup>T</sup>    | 40.6     | [38.1 - 43.2] |
| R-69608   | <i>P. elongata</i> 5N <sup>T</sup>            | 42.9     | [40.4 - 45.5] | R-69749                | <i>P. madseniana</i> RP11 <sup>T</sup>        | 42       | [39.5 - 44.6] |
| R-69608   | <i>P. caffeinilytica</i> CF1 <sup>T</sup>     | 43.9     | [41.3 - 46.4] | R-69749                | <i>P. sediminicola</i> LMG 24238 <sup>T</sup> | 40.1     | [37.6 - 42.6] |
| R-69608   | R-69658                                       | 64.6     | [61.7 - 67.4] | R-69749                | <i>P. solitsugae</i> 1N <sup>T</sup>          | 46.3     | [43.7 - 48.9] |
| R-69608   | R-69746                                       | 63.3     | [60.4 - 66.1] | R-69749                | <i>P. elongata</i> 5N <sup>T</sup>            | 43.8     | [41.3 - 46.4] |
| R-69608   | R-75465                                       | 62.8     | [59.9 - 65.6] | R-69749                | <i>P. caffeinilytica</i> CF1 <sup>T</sup>     | 39.8     | [37.3 - 42.3] |
| R-69608   | LMG 31836 <sup>T</sup>                        | 90.6     | [88.3 - 92.4] | R-69749                | R-75465                                       | 40.9     | [38.4 - 43.5] |
| R-69608   | LMG 31840                                     | 91.4     | [89.2 - 93.1] | R-69749                | LMG 31836 <sup>T</sup>                        | 41       | [38.5 - 43.5] |
| R-69608   | R-69776                                       | 91.9     | [89.8 - 93.6] | R-69749                | R-69776                                       | 43.9     | [41.4 - 46.5] |
| R-69608   | R-75777                                       | 91.6     | [89.5 - 93.4] | R-69749                | R-75777                                       | 43.5     | [41.0 - 46.1] |
| R-69608   | LMG 31832 <sup>T</sup>                        | 41.2     | [38.7 - 43.7] | R-69749                | LMG 31832 <sup>T</sup>                        | 95.1     | [93.5 - 96.3] |
| R-69608   | R-69749                                       | 43.5     | [41.0 - 46.1] | R-69749                | R-69927                                       | 96.6     | [95.3 - 97.5] |
| R-69608   | R-69927                                       | 41.1     | [38.6 - 43.7] | R-69749                | R-70006                                       | 97       | [95.8 - 97.8] |
| R-69608   | R-70006                                       | 41.1     | [38.6 - 43.7] | R-69749                | R-70199                                       | 97.6     | [96.6 - 98.3] |
| R-69608   | R-70199                                       | 41.2     | [38.7 - 43.7] | R-69749                | R-70211                                       | 97.5     | [96.4 - 98.2] |
| R-69608   | R-70211                                       | 40.9     | [38.4 - 43.4] | R-69749                | R-75471                                       | 97.5     | [96.5 - 98.3] |
| R-69608   | R-75471                                       | 41.1     | [38.6 - 43.7] | R-69749                | LMG 31837 <sup>T</sup>                        | 40.8     | [38.3 - 43.3] |

| Strain 1 | Strain 2                                      | dDDH (%) | C.I. (%)      | Strain 1               | Strain 2                                      | dDDH (%) | C.I. (%)      |
|----------|-----------------------------------------------|----------|---------------|------------------------|-----------------------------------------------|----------|---------------|
| R-69927  | <i>P. aspalathi</i> LMG 27731 <sup>T</sup>    | 40.6     | [38.1 - 43.1] | R-70211                | R-75777                                       | 40.8     | [38.3 - 43.4] |
| R-69927  | <i>P. madseniana</i> RP11 <sup>T</sup>        | 41.9     | [39.4 - 44.4] | R-70211                | LMG 31832 <sup>T</sup>                        | 96.1     | [94.7 - 97.1] |
| R-69927  | <i>P. sediminicola</i> LMG 24238 <sup>T</sup> | 40       | [37.5 - 42.5] | R-70211                | R-75471                                       | 98.5     | [97.8 - 99.0] |
| R-69927  | <i>P. solitsugae</i> 1N <sup>T</sup>          | 46.4     | [43.8 - 49.0] | R-75471                | <i>P. aspalathi</i> LMG 27731 <sup>T</sup>    | 40.5     | [38.0 - 43.0] |
| R-69927  | <i>P. elongata</i> 5N <sup>T</sup>            | 43.7     | [41.2 - 46.3] | R-75471                | <i>P. madseniana</i> RP11 <sup>T</sup>        | 41.9     | [39.4 - 44.4] |
| R-69927  | <i>P. caffeinilytica</i> CF1 <sup>T</sup>     | 39.7     | [37.2 - 42.2] | R-75471                | <i>P. sediminicola</i> LMG 24238 <sup>T</sup> | 40       | [37.5 - 42.5] |
| R-69927  | R-75465                                       | 40.7     | [38.2 - 43.3] | R-75471                | <i>P. solitsugae</i> 1N <sup>T</sup>          | 46.5     | [43.9 - 49.1] |
| R-69927  | LMG 31836 <sup>T</sup>                        | 40.6     | [38.1 - 43.1] | R-75471                | <i>P. elongata</i> 5N <sup>T</sup>            | 43.8     | [41.2 - 46.3] |
| R-69927  | R-75777                                       | 40.9     | [38.4 - 43.4] | R-75471                | <i>P. caffeinilytica</i> CF1 <sup>T</sup>     | 39.8     | [37.3 - 42.3] |
| R-69927  | LMG 31832 <sup>T</sup>                        | 95.2     | [93.7 - 96.4] | R-75471                | R-75777                                       | 40.9     | [38.4 - 43.4] |
| R-69927  | R-70006                                       | 97.1     | [95.9 - 97.9] | R-75471                | LMG 31832 <sup>T</sup>                        | 96.6     | [95.3 - 97.5] |
| R-69927  | R-70199                                       | 97.8     | [96.9 - 98.5] | LMG 31837 <sup>T</sup> | <i>P. aspalathi</i> LMG 27731 <sup>T</sup>    | 39.3     | [36.8 - 41.8] |
| R-69927  | R-70211                                       | 97.8     | [96.9 - 98.5] | LMG 31837 <sup>T</sup> | <i>P. madseniana</i> RP11 <sup>T</sup>        | 41       | [38.5 - 43.5] |
| R-69927  | R-75471                                       | 98.1     | [97.3 - 98.7] | LMG 31837 <sup>T</sup> | <i>P. sediminicola</i> LMG 24238 <sup>T</sup> | 38.9     | [36.4 - 41.4] |
| R-70006  | <i>P. aspalathi</i> LMG 27731 <sup>T</sup>    | 40.5     | [38.1 - 43.1] | LMG 31837 <sup>T</sup> | <i>P. solitsugae</i> 1N <sup>T</sup>          | 41       | [38.5 - 43.5] |
| R-70006  | <i>P. madseniana</i> RP11 <sup>T</sup>        | 41.9     | [39.4 - 44.5] | LMG 31837 <sup>T</sup> | <i>P. elongata</i> 5N <sup>T</sup>            | 44.8     | [42.2 - 47.3] |
| R-70006  | <i>P. sediminicola</i> LMG 24238 <sup>T</sup> | 40       | [37.5 - 42.5] | LMG 31837 <sup>T</sup> | <i>P. caffeinilytica</i> CF1 <sup>T</sup>     | 39.1     | [36.6 - 41.6] |
| R-70006  | <i>P. solitsugae</i> 1N <sup>T</sup>          | 46.4     | [43.8 - 49.0] | LMG 31837 <sup>T</sup> | R-75465                                       | 39.3     | [36.8 - 41.8] |
| R-70006  | <i>P. elongata</i> 5N <sup>T</sup>            | 43.7     | [41.2 - 46.3] | LMG 31837 <sup>T</sup> | LMG 31836 <sup>T</sup>                        | 39.5     | [37.0 - 42.1] |
| R-70006  | <i>P. caffeinilytica</i> CF1 <sup>T</sup>     | 39.7     | [37.2 - 42.3] | LMG 31837 <sup>T</sup> | R-75777                                       | 39.8     | [37.3 - 42.3] |
| R-70006  | R-75465                                       | 40.7     | [38.2 - 43.2] | LMG 31837 <sup>T</sup> | LMG 31832 <sup>T</sup>                        | 40.7     | [38.2 - 43.2] |
| R-70006  | LMG 31836 <sup>T</sup>                        | 40.6     | [38.1 - 43.1] | LMG 31837 <sup>T</sup> | R-69927                                       | 40.6     | [38.1 - 43.1] |
| R-70006  | R-75777                                       | 40.9     | [38.4 - 43.4] | LMG 31837 <sup>T</sup> | R-70006                                       | 40.6     | [38.1 - 43.1] |
| R-70006  | LMG 31832 <sup>T</sup>                        | 96.1     | [94.7 - 97.1] | LMG 31837 <sup>T</sup> | R-70199                                       | 40.5     | [38.0 - 43.0] |
| R-70006  | R-70199                                       | 98.1     | [97.2 - 98.7] | LMG 31837 <sup>T</sup> | R-70211                                       | 40.4     | [37.9 - 43.0] |
| R-70006  | R-70211                                       | 97.7     | [96.8 - 98.4] | LMG 31837 <sup>T</sup> | R-75471                                       | 40.5     | [38.1 - 43.1] |
| R-70006  | R-75471                                       | 98.4     | [97.6 - 98.9] |                        |                                               |          |               |
| R-70199  | <i>P. aspalathi</i> LMG 27731 <sup>T</sup>    | 40.6     | [38.1 - 43.1] |                        |                                               |          |               |
| R-70199  | <i>P. madseniana</i> RP11 <sup>T</sup>        | 41.9     | [39.4 - 44.5] |                        |                                               |          |               |
| R-70199  | <i>P. sediminicola</i> LMG 24238 <sup>T</sup> | 39.9     | [37.4 - 42.5] |                        |                                               |          |               |
| R-70199  | <i>P. solitsugae</i> 1N <sup>T</sup>          | 46.4     | [43.8 - 48.9] |                        |                                               |          |               |
| R-70199  | <i>P. elongata</i> 5N <sup>T</sup>            | 43.8     | [41.2 - 46.3] |                        |                                               |          |               |
| R-70199  | <i>P. caffeinilytica</i> CF1 <sup>T</sup>     | 39.8     | [37.3 - 42.3] |                        |                                               |          |               |
| R-70199  | R-75465                                       | 40.7     | [38.2 - 43.3] |                        |                                               |          |               |
| R-70199  | LMG 31836 <sup>T</sup>                        | 40.7     | [38.2 - 43.2] |                        |                                               |          |               |
| R-70199  | R-75777                                       | 40.9     | [38.4 - 43.4] |                        |                                               |          |               |
| R-70199  | LMG 31832 <sup>T</sup>                        | 96.2     | [94.9 - 97.2] |                        |                                               |          |               |
| R-70199  | R-70211                                       | 98.4     | [97.6 - 98.9] |                        |                                               |          |               |
| R-70199  | R-75471                                       | 98.5     | [97.8 - 99.0] |                        |                                               |          |               |
| R-70211  | <i>P. aspalathi</i> LMG 27731 <sup>T</sup>    | 40.7     | [38.2 - 43.2] |                        |                                               |          |               |
| R-70211  | <i>P. madseniana</i> RP11 <sup>T</sup>        | 41.9     | [39.4 - 44.5] |                        |                                               |          |               |
| R-70211  | <i>P. sediminicola</i> LMG 24238 <sup>T</sup> | 40       | [37.5 - 42.5] |                        |                                               |          |               |
| R-70211  | <i>P. solitsugae</i> 1N <sup>T</sup>          | 46.4     | [43.9 - 49.0] |                        |                                               |          |               |
| R-70211  | <i>P. elongata</i> 5N <sup>T</sup>            | 43.8     | [41.3 - 46.4] |                        |                                               |          |               |
| R-70211  | <i>P. caffeinilytica</i> CF1 <sup>T</sup>     | 39.8     | [37.3 - 42.3] |                        |                                               |          |               |
| R-70211  | R-75465                                       | 40.6     | [38.1 - 43.2] |                        |                                               |          |               |
| R-70211  | LMG 31836 <sup>T</sup>                        | 40.7     | [38.2 - 43.2] |                        |                                               |          |               |
